# Supplementary material for: Extensive Transcription Analysis of the Hyposoter didymator Ichnovirus Genome in Permissive and Non-Permissive Lepidopteran Host Species
Source: PLoS One. 2014 Aug 12;9(8):e104072. doi: 10.1371/journal.pone.0104072 (PMC4130501; doi:10.1371/journal.pone.0104072)
Supplement: Table S2 — Characteristics of HdIV genome segments. The features of the HdIV segments are indicated: name, size (nt), presence and position of internal direct repeats and Blastn sequence similarities to other IV segments (ID of the best blast, % identity, alignment length (nt), e-value). For each segment, the features of predicted ORFs are indicated: name, strand, position, length (nt) and blastx or tblastx sequence similarity to other IV genes (ID of the best blast, % identity, alignment length (nt), e-value). (XLSX) [file pone.0104072.s004.xlsx]

## Sheet: Feuil2
HdIV Segment name	Segment size (nt)	Internal Direct Repeats (DR) position	Polydnavirus sequence similarity (blastn > 60 % identity)	% identity	alignment length (nt)	e-value	ORF name	Strand	Position	Lenght (nt)	Best blastx with [Hyposoter didymator ichnovirus]	% identity	alignment length (aa)	e-value	Best blastx with [Hyposoter fugitivus ichnovirus]	% identity	alignment length (aa)	e-value	Best blastx with [Tranosema rostrale ichnovirus]	% identity	alignment length (aa)	e-value	Best blastx with [Campoletis sonorensis ichnovirus]	% identity	alignment length (aa)	e-value	Best blastx with [Campoletis chlorideae ichnovirus]	% identity	alignment length (aa)	e-value	Best tblastx with [Diadegma semiclausum ichnovirus]	% identity	alignment length (aa)	e-value
Hd45	2548	no detected DR	gi|124484806|ref|NC_009001.1| Hyposoter fugitivus ichnovirus segment C13	76.19	777	2e-147	D8_Hd45	-	join(1128..1243,1329..1458,1548..1644,1920..1990)	414	gi|28193982|gb|AAO33352.1|AF464931_1 unknown	94.93	138	1e-88
			gi|124484729|ref|NC_008985.1| Hyposoter fugitivus ichnovirus segment C20	80.42	424	1e-103
Hd44	2831	no detected DR	gi|124484649|ref|NC_008958.1| Hyposoter fugitivus ichnovirus segment A3	74.75	1018	0.0	U1_Hd44	+	31..372	342
							U2_Hd44	-	907..1218	312					gi|124484650|ref|YP_001031244.1| a3.1	61.17	103	2e-36
Hd43	2923	no detected DR	gi|124484641|ref|NC_008956.1| Hyposoter fugitivus ichnovirus segment B1	69.57	1492	0.0	U1_Hd43	+	1384..1683	300
							Vank1_Hd43	+	2363..2887	525	gi|383465297|gb|AFH35111.1| vankyrin 1	100.00	165	2e-119	gi|124484642|ref|YP_001031239.1| vankyrin-b1	52.12	165	4e-54	gi|61007119|gb|AAX37362.1| putative ankyrin 2	40.96	166	4e-30					gi|111434286|gb|ABH10021.1| vankyrin 2	41.18	136	2e-29
Hd42	2942	no detected DR					Rep1_Hd42	-	898..1680	783					gi|124484629|ref|YP_001031230.1| repeat element protein-b11	51.20	209	2e-62
Hd41	3005	no detected DR					U1_Hd41	-	join(390..408,799..919,1017..1122,1213..1318,1674..1768,2232..2284,2379..2469)	591	gi|41323490|gb|AAR99905.1| hypothetical polypeptide II	81.48	27	4e-05
Hd40	3284	no detected DR					U1_Hd40	+	1149..1577	429					gi|124484704|ref|YP_001031282.1| c6.3	47.50	80	0.14
							U2_Hd40	+	2836..3180	345
Hd39	3356	no detected DR	gi|124484668|ref|NC_008965.1| Hyposoter fugitivus ichnovirus segment B12	75.57	1052	0.0	Rep1_Hd39	+	2095..2796	702					gi|124484671|ref|YP_001031258.1| repeat element protein-b12.1	67.40	227	3e-102	gi|124270731|dbj|BAF45626.1| f3.2	48.15	216	4e-67
Hd38	3478	no detected DR	gi|124484661|ref|NC_008962.1| Hyposoter fugitivus ichnovirus segment B5	81.15	1082	0.0	U1_Hd38	-	296..619	324
		no detected DR	gi|124484666|ref|NC_008964.1| Hyposoter fugitivus ichnovirus segment B10	74.76	1894	0.0	Vinx1_Hd38	+	842..1972	1131					gi|124484667|ref|YP_001031255.1| viral innexin-b10.1	59.49	353	2e-138													gi|325514238|gb|JI257597.1|Contig37548-2303 mRNA sequence	58.90	146	5e-107
							F1U2_Hd38	-	2107..2427	321					gi|124484664|ref|YP_001031254.1| b5.3	82.52	103	4e-53													gi|325514252|gb|JI257611.1|Contig93984 mRNA sequence	80.00	40	2e-19
Hd37	3543	no detected DR	gi|124484628|ref|NC_008951.1| Hyposoter fugitivus ichnovirus segment B11	70.21	1457	0.0	U1_Hd37	+	173..601	429					gi|124484647|ref|YP_001031242.1| a2.1	76.19	21	5.6
			gi|124484646|ref|NC_008957.1| Hyposoter fugitivus ichnovirus segment A2	79.96	564	2e-134	U2_Hd37	+	1214..1651	438
							Rep1_Hd37	-	2347..3150	804					gi|124484629|ref|YP_001031230.1| repeat element protein-b11	59.85	269	5e-106	gi|124270667|dbj|BAF45579.1| b2.2	41.15	209	3e-45
Hd36	3550	no detected DR	gi|124484666|ref|NC_008964.1| Hyposoter fugitivus ichnovirus segment B10	76.91	1477	0.0	F1U1_Hd36	+	1348..1668	321					gi|124484664|ref|YP_001031254.1| b5.3	82.52	103	3e-53
			gi|124484661|ref|NC_008962.1| Hyposoter fugitivus ichnovirus segment B5	76.81	1324	0.0	Vinx1_Hd36	-	1857..2945	1089	gi|27475782|gb|AAO16963.1|AF364057_1 viral innexin	100.00	363	0.0	gi|124484667|ref|YP_001031255.1| viral innexin-b10.1	66.39	363	3e-173
Hd35	3578	no detected DR	gi|124484804|ref|NC_009000.1| Hyposoter fugitivus ichnovirus segment B14	70.30	1037	4e-113	Rep1_Hd35	+	1941..2645	705					gi|124484805|ref|YP_001031359.1| repeat element protein-b14.1	54.31	232	1e-82	gi|124270710|dbj|BAF45610.1| d5.1	40.27	226	2e-48									gi|325514241|gb|JI257600.1|Contig40837 mRNA sequence	44.12	68	4e-43
Hd34	3597	no detected DR	gi|124484680|ref|NC_008968.1| Hyposoter fugitivus ichnovirus segment B16	80.60	500	1e-125	F4U1_Hd34	+	1086..1457	372
			gi|124484672|ref|NC_008966.1| Hyposoter fugitivus ichnovirus segment B13	70.17	1019	7e-135	F5U2_Hd34	-	1914..2285	372					gi|124484682|ref|YP_001031266.1| b16.2	62.07	29	1e-07
Hd33	3610	no detected DR	gi|124484665|ref|NC_008963.1| Hyposoter fugitivus ichnovirus segment B9	68.11	1085	3e-107
Hd32	3810	no detected DR	gi|124484616|ref|NC_008946.1| Hyposoter fugitivus ichnovirus segment C16	73.37	1806	0.0	Vinx1_Hd32	+	928..2025	1098					gi|124484617|ref|YP_001031223.1| innexin Vnx-c16	67.32	358	4e-174	gi|124270724|dbj|BAF45621.1| e1.1	56.91	362	1e-133	gi|28630903|gb|AAO45829.1| innexin Vnx-g1	55.43	359	5e-127					gi|325514239|gb|JI257598.1|Contig52542-47569-7629 mRNA sequence	68.09	188	1e-86
							U1_Hd32	+	2697..3011	315
Hd31	3874	no detected DR	gi|124484672|ref|NC_008966.1| Hyposoter fugitivus ichnovirus segment B13	70.17	1019	7e-135	F4U1_Hd31	+	808..1179	372
			gi|124484680|ref|NC_008968.1| Hyposoter fugitivus ichnovirus segment B16	71.26	748	2e-111	F5U2_Hd31	-	2054..2431	378					gi|124484682|ref|YP_001031266.1| b16.2	53.33	30	1e-06
Hd30	3887	no detected DR	gi|124484622|ref|NC_008949.1| Hyposoter fugitivus ichnovirus segment B7	81.56	2679	0.0	U1_Hd30	+	93..404	312
							U2_Hd30	-	514..1377	864					gi|124484624|ref|YP_001031227.1| b7.1	75.21	242	6e-96
							Vinx1_Hd30	-	1860..2987	1128					gi|124484623|ref|YP_001031226.1| innexin Vnx-b7	75.00	376	0.0	gi|124270708|dbj|BAF45609.1| d4.1	60.64	376	2e-152	gi|28630903|gb|AAO45829.1| innexin Vnx-g1	57.26	358	3e-126
							U3_Hd30	+	3302..3622	321
Hd29	3917	no detected DR	gi|124484620|ref|NC_008948.1| Hyposoter fugitivus ichnovirus segment C12	68.74	1203	6e-117	N-gene1_Hd29	+	1459..2748	1290					gi|124484621|ref|YP_001031225.1| c12.1	45.52	391	6e-103													gi|325514249|gb|JI257608.1|Contig37537 mRNA sequence	51.63	184	2e-103
Hd28	3948	no detected DR	gi|124484632|ref|NC_008953.1| Hyposoter fugitivus ichnovirus segment B17	76.67	2207	0.0	Vinx1_Hd28	+	461..919	459					gi|124484634|ref|YP_001031233.1| innexin Vnx-b17	82.35	153	2e-83	gi|124270708|dbj|BAF45609.1| d4.1	50.33	153	9e-49	gi|94675984|ref|YP_589075.1| innexin-like protein 2	44.81	154	2e-43
							Vinx2_Hd28	+	962..1468	507					gi|124484634|ref|YP_001031233.1| innexin Vnx-b17	75.16	161	9e-77	gi|124270724|dbj|BAF45621.1| e1.1	52.15	163	1e-50	gi|28630903|gb|AAO45829.1| innexin Vnx-g1	52.78	144	2e-46
							Vank1_Hd28	+	2325..2834	510	gi|383465303|gb|AFH35114.1| vankyrin 1	100.00	170	3e-122	gi|124484633|ref|YP_001031232.1| vankyrin-b17	67.06	170	9e-77	gi|61007119|gb|AAX37362.1| putative ankyrin 2	44.94	158	3e-36	gi|61967948|gb|AAX56953.1| vankyrin 1	50.67	150	2e-42
Hd27	3978	no detected DR	gi|124484630|ref|NC_008952.1| Hyposoter fugitivus ichnovirus segment C2	71.25	1200	5e-162	U1_Hd27	+	392..730	339
							K-19_Hd27	-	join(2642..2869,2989..3078)	318	gi|9651925|gb|AAF91314.1|AF241775_1 P12	100.00	106	4e-55	gi|124484631|ref|YP_001031231.1| P12-like protein-c2	41.77	79	7e-06													gi|325514250|gb|JI257609.1|Contig1108 mRNA sequence	59.52	42	1e-20
Hd26a	3896	DR: 1517..1781; 3445..3650	gi|124484672|ref|NC_008966.1| Hyposoter fugitivus ichnovirus segment B13	71.91	1620	0.0	PRRP1_Hd26a	+	1150..1557	408																					gi|325514247|gb|JI257606.1|Contig37733 mRNA sequence	65.85	41	9e-24
			gi|124484680|ref|NC_008968.1| Hyposoter fugitivus ichnovirus segment B16	76.82	591	1e-113	PRRP2_Hd26a	+	3093..3485	393
Hd26b	4000	DR: 499..763; 2427..2632	gi|124484672|ref|NC_008966.1| Hyposoter fugitivus ichnovirus segment B13	71.91	1620	0.0	PRRP1_Hd26b	+	132..539	408																					gi|325514247|gb|JI257606.1|Contig37733 mRNA sequence	65.85	41	9e-24
			gi|124484680|ref|NC_008968.1| Hyposoter fugitivus ichnovirus segment B16	76.96	625	1e-126	PRRP2_Hd26b	+	2075..2467	393
							U1_Hd26b	-	3073..3420	348
Hd25	4032	no detected DR					PRRP1_Hd25	-	347..529	183
							PRRP2_Hd25	+	1852..2259	408					gi|124484787|ref|YP_001031345.1| polar residue rich protein-d12.4	63.64	33	0.002
							PRRP3_Hd25	-	3642..3881	240
Hd24	4044	no detected DR	gi|124484632|ref|NC_008953.1| Hyposoter fugitivus ichnovirus segment B17	81.97	2074	0.0	Vinx1_Hd24	+	732..1802	1071					gi|124484634|ref|YP_001031233.1| innexin Vnx-b17	82.68	358	0.0	gi|124270724|dbj|BAF45621.1| e1.1	52.82	354	2e-128	gi|28630903|gb|AAO45829.1| innexin Vnx-g1	49.86	357	2e-121
							Vank1_Hd24	+	2575..3084	510	gi|383465299|gb|AFH35112.1| vankyrin 1	100.00	170	2e-122	gi|124484633|ref|YP_001031232.1| vankyrin-b17	64.71	170	1e-75	gi|61007119|gb|AAX37362.1| putative ankyrin 2	44.94	158	4e-36	gi|61967948|gb|AAX56953.1| vankyrin 1	47.20	161	1e-42					gi|325514234|gb|JI257593.1|Contig257 mRNA sequence	60.59	170	7e-70
Hd23	4055	no detected DR	gi|124484804|ref|NC_009000.1| Hyposoter fugitivus ichnovirus segment B14	67.88	2279	0.0	Rep1_Hd23	+	join(1..257,3524..4055)	789					gi|124484805|ref|YP_001031359.1| repeat element protein-b14.1	61.11	252	4e-100	gi|124270710|dbj|BAF45610.1| d5.1	44.89	225	5e-49
Hd22	4062	no detected DR	gi|124484684|ref|NC_008969.1| Hyposoter fugitivus ichnovirus segment B18	73.52	2972	0.0	Rep1_Hd22	+	1435..2046	612	gi|40737201|gb|AAR89180.1| repeat element protein 8	99.46	185	1e-133	gi|124484686|ref|YP_001031269.1| repeat element protein-b18.1	70.39	179	7e-85	gi|124270927|dbj|BAF45769.1| c289.1 [Tranosema rostrales ichnovirus]	50.57	174	2e-52
							U1_Hd22	+	3371..3697	327
Hd21	4128		gi|124484689|ref|NC_008971.1| Hyposoter fugitivus ichnovirus segment C3	79.24	1262	0.0	Rep1_Hd21	-	join(4107..4128,1..767)	789					gi|124484693|ref|YP_001031274.1| repeat element protein-c3.1	66.67	225	8e-106	gi|124270667|dbj|BAF45579.1| b2.2	45.60	182	9e-51
							Vinx1_Hd21	-	2213..3292	1080					gi|124484691|ref|YP_001031272.1| viral innexin-c3.1	69.75	357	0.0	gi|124270724|dbj|BAF45621.1| e1.1	46.67	360	3e-119	gi|94675984|ref|YP_589075.1| innexin-like protein 2	45.98	361	2e-112
Hd20a	4206	no detected DR	gi|124484694|ref|NC_008972.1| Hyposoter fugitivus ichnovirus segment C4	75.68	2356	0.0	Cys1_Hd20a	+	join(1056..1271,1432..1608,1900..2268)	762					gi|124484696|ref|YP_001031276.1| cysteine motif gene-c4.1	70.08	127	1e-56	gi|218741174|dbj|BAF45771.2| c111.1	40.23	87	4e-12	gi|28565787|gb|AAO43443.1| A'Hv0.8 cys-motif protein precursor	45.28	106	1e-20
							U1_Hd20a	-	3515..3640	126
Hd20b	3795	no detected DR	gi|124484808|ref|NC_009002.1| Hyposoter fugitivus ichnovirus segment C19	72.18	1143	8e-160	U1_Hd20b	-	210..335	126
			gi|124484694|ref|NC_008972.1| Hyposoter fugitivus ichnovirus segment C4	76.95	859	3e-178	Cys1_Hd20b	+	join(1900..1920,2106..2264,2523..2777)	435					gi|124484809|ref|YP_001031361.1| cysteine motif gene-c19.1	65.65	131	2e-53					gi|28565787|gb|AAO43443.1| A'Hv0.8 cys-motif protein precursor	48.39	93	1e-20
Hd19	4306	no detected DR	gi|124484806|ref|NC_009001.1| Hyposoter fugitivus ichnovirus segment C13	74.51	2260	0.0	U1_Hd19	-	join(694..849,936..1018,1096..2136,2220..2313,2422..2613,2721..2943,3211..3275)	1854					gi|124484807|ref|YP_001031360.1| c13.1	52.15	372	2e-78
			gi|124484729|ref|NC_008985.1| Hyposoter fugitivus ichnovirus segment C20	75.21	948	0.0
Hd18	4578	no detected DR	gi|124484635|ref|NC_008954.1| Hyposoter fugitivus ichnovirus segment C10	69.63	935	4e-107	N-gene1_Hd18	+	1879..3192	1314					gi|124484636|ref|YP_001031234.1| c10.1	44.84	417	9e-93													gi|325514251|gb|JI257610.1|Contig40032 mRNA sequence	62.07	116	9e-63
Hd17a	4466	no detected DR	gi|124484722|ref|NC_008984.1| Hyposoter fugitivus ichnovirus segment C18	78.42	1325	0.0	Rep3_Hd17a	+	join(3994..4466,1..214)	687	gi|27475778|gb|AAO16960.1|AF364056_1 repeat element protein	99.56	229	0.0	gi|124484723|ref|YP_001031294.1| repeat element protein-c18.1	73.37	169	1e-83	gi|124270731|dbj|BAF45626.1| f3.2	41.04	173	4e-35
							Rep1_Hd17a	+	838..1545	708	gi|27475779|gb|AAO16961.1|AF364056_2 repeat element protein	99.58	236	0.0	gi|124484726|ref|YP_001031297.1| repeat element protein-c18.2	69.27	179	2e-78	gi|124270710|dbj|BAF45610.1| d5.1	51.09	229	2e-70
							Rep2_Hd17a	+	2245..2919	675	gi|27475776|gb|AAO16959.1|AF364055_3 repeat element protein	100.00	225	2e-153	gi|124484750|ref|YP_001031315.1| repeat element protein-d4.1	43.43	198	5e-48	gi|124270731|dbj|BAF45626.1| f3.2	49.17	181	8e-53									gi|325514244|gb|JI257603.1|Contig42466 mRNA sequence	61.27	204	5e-87
Hd17b	4643	no detected DR	gi|124484722|ref|NC_008984.1| Hyposoter fugitivus ichnovirus segment C18	78.86	1769	0.0	Rep1_Hd17b	+	join(4300..4643,1..346)	690	gi|27475775|gb|AAO16958.1|AF364055_2 repeat element protein	98.70	230	0.0	gi|124484726|ref|YP_001031297.1| repeat element protein-c18.2	69.27	179	3e-79	gi|124270710|dbj|BAF45610.1| d5.1	51.52	231	5e-73
							Rep2_Hd17b	+	1046..1720	675	gi|27475776|gb|AAO16959.1|AF364055_3 repeat element protein	100.00	225	2e-153	gi|124484750|ref|YP_001031315.1| repeat element protein-d4.1	43.43	198	5e-48	gi|124270731|dbj|BAF45626.1| f3.2	49.17	181	8e-53									gi|325514244|gb|JI257603.1|Contig42466 mRNA sequence	61.27	204	5e-87
							Rep3_Hd17b	+	2795..3526	732	gi|27475774|gb|AAO16957.1|AF364055_1 repeat element protein	100.00	244	0.0	gi|124484723|ref|YP_001031294.1| repeat element protein-c18.1	77.05	244	2e-122	gi|124270692|dbj|BAF45598.1| c7-1.1	42.25	213	2e-49									gi|325514242|gb|JI257601.1|Contig38689 mRNA sequence	68.88	196	7e-102
Hd16	4760	no detected DR	gi|124484697|ref|NC_008973.1| Hyposoter fugitivus ichnovirus segment C5	80.24	1063	0.0	Rep1_Hd16	-	25..747	723	gi|40737197|gb|AAR89178.1| repeat element protein 6	98.63	219	0.0	gi|124484734|ref|YP_001031302.1| repeat element protein-d1.1	59.56	225	8e-91	gi|124270924|dbj|BAF45767.1| c166.1 [Tranosema rostrales ichnovirus]	43.19	213	3e-50
			gi|124484731|ref|NC_008986.1| Hyposoter fugitivus ichnovirus segment D1	76.38	1050	0.0	U1_Hd16	+	3053..3613	239
Hd15	4762	no detected DR	gi|124484709|ref|NC_008979.1| Hyposoter fugitivus ichnovirus segment C9	69.46	1883	0.0	N-gene1_Hd15	-	959..2431	1473					gi|124484710|ref|YP_001031285.1| N gene-c9.1	53.66	246	3e-79
Hd14	5118	no detected DR	gi|124484715|ref|NC_008981.1| Hyposoter fugitivus ichnovirus segment C14	76.84	803	1e-158	Vinx1_Hd14	+	955..1383	429									gi|124270708|dbj|BAF45609.1| d4.1	43.48	46	1.4
							U1_Hd14	+	3174..3479	306					gi|124484716|ref|YP_001031289.1| c14.1	67.21	61	3e-16
Hd13	5144	no detected DR					Cys1_Hd13	-	join(1485..1841,2198..2326)	486					gi|124484696|ref|YP_001031276.1| cysteine motif gene-c4.1	40.26	77	5e-09
							Cys2_Hd13	-	join(4427..4765,4881..5012)	471					gi|124484809|ref|YP_001031361.1| cysteine motif gene-c19.1	41.96	112	4e-21					gi|28565787|gb|AAO43443.1| A'Hv0.8 cys-motif protein precursor	45.26	95	7e-22
Hd12	5421	no detected DR	gi|124484697|ref|NC_008973.1| Hyposoter fugitivus ichnovirus segment C5	76.83	1351	0.0	U1_Hd12	+	97..429	333
			gi|124484618|ref|NC_008947.1| Hyposoter fugitivus ichnovirus segment A1	71.02	1094	1e-146	Rep1_Hd12	-	1078..1761	684	gi|40737195|gb|AAR89177.1| repeat element protein 5	86.40	228	8e-143	gi|124484698|ref|YP_001031277.1| repeat element protein-c5.1	74.56	228	2e-122	gi|124270924|dbj|BAF45767.1| c166.1 [Tranosema rostrales ichnovirus]	46.48	213	2e-61
			gi|124484735|ref|NC_008987.1| Hyposoter fugitivus ichnovirus segment D2	73.33	806	1e-140	U2_Hd12	-	3873..4184	312					gi|124484739|ref|YP_001031306.1| d2.3	49.37	79	1e-10
							Rep2_Hd12	-	4558..5247	690					gi|124484742|ref|YP_001031309.1| repeat element protein-d2.2	62.15	214	1e-88	gi|124270715|dbj|BAF45614.1| d6.1	53.80	171	2e-61
Hd11a	6027	no detected DR	gi|124484764|ref|NC_008992.1| Hyposoter fugitivus ichnovirus segment D8	80.05	1464	0.0	Vank2_Hd11a	-	267..773	507	gi|383465307|gb|AFH35116.1| vankyrin 2	100.00	169	1e-111	gi|124484765|ref|YP_001031327.1| vankyrin-d8.1	66.27	169	7e-68	gi|61007119|gb|AAX37362.1| putative ankyrin 2	44.90	147	4e-31	gi|61967958|gb|AAX56958.1| vankyrin 2	50.00	146	7e-42	gi|111434286|gb|ABH10021.1| vankyrin 2	50.00	146	3e-41
							Vank3_Hd11a	-	1140..1646	507	gi|383465309|gb|AFH35117.1| vankyrin 3	100.00	169	1e-121	gi|124484765|ref|YP_001031327.1| vankyrin-d8.1	71.01	169	1e-80	gi|61007119|gb|AAX37362.1| putative ankyrin 2	49.59	121	2e-29	gi|61967958|gb|AAX56958.1| vankyrin 2	48.65	148	3e-41	gi|111434286|gb|ABH10021.1| vankyrin 2	46.75	169	7e-43
							Vank4_Hd11a	-	2247..2753	507	gi|383465311|gb|AFH35118.1| vankyrin 4	100.00	169	1e-122	gi|124484765|ref|YP_001031327.1| vankyrin-d8.1	76.33	169	3e-89	gi|61007119|gb|AAX37362.1| putative ankyrin 2	42.94	170	2e-33	gi|61967958|gb|AAX56958.1| vankyrin 2	51.37	146	3e-46	gi|111434286|gb|ABH10021.1| vankyrin 2	49.70	169	3e-49
							Vank5_Hd11a	-	3814..4317	504	gi|383465313|gb|AFH35119.1| vankyrin 5	100.00	168	4e-122	gi|124484768|ref|YP_001031330.1| vankyrin-d8.4	79.76	168	2e-98	gi|61007118|gb|AAX37361.1| putative ankyrin 1	46.39	166	7e-40	gi|61967958|gb|AAX56958.1| vankyrin 2	51.79	168	2e-51	gi|111434286|gb|ABH10021.1| vankyrin 2	51.88	160	5e-51
							Vank1_Hd11a	-	5343..5819	477	gi|383465301|gb|AFH35113.1| vankyrin 1	100.00	159	1e-96	gi|124484767|ref|YP_001031329.1| vankyrin-d8.3	77.99	159	1e-71	gi|61007119|gb|AAX37362.1| putative ankyrin 2	44.51	164	2e-27	gi|61967952|gb|AAX56955.1| vankyrin 3	59.86	147	7e-45	gi|111434284|gb|ABH10020.1| vankyrin 1	47.10	155	2e-30	gi|325514235|gb|JI257594.1|Contig164429 mRNA sequence	64.47	152	1e-62
Hd11b	3904	no detected DR	gi|124484677|ref|NC_008967.1| Hyposoter fugitivus ichnovirus segment B15	74.98	1255	0.0	Vank1_Hd11b	-	710..1186	477	gi|383465301|gb|AFH35113.1| vankyrin 1	100.00	159	1e-96	gi|124484767|ref|YP_001031329.1| vankyrin-d8.3	77.99	159	1e-71	gi|61007119|gb|AAX37362.1| putative ankyrin 2	44.51	164	2e-27	gi|61967952|gb|AAX56955.1| vankyrin 3	59.86	147	7e-45	gi|111434284|gb|ABH10020.1| vankyrin 1	47.10	155	2e-30	gi|325514235|gb|JI257594.1|Contig164429 mRNA sequence	64.47	152	1e-62
							Rep1_Hd11b	-	1905..2597	693					gi|124484678|ref|YP_001031263.1| repeat element protein-b15.1	77.82	239	6e-136	gi|124270678|dbj|BAF45588.1| c3.2	56.17	235	1e-86
							U1_Hd11b	-	2817..3200	384
Hd10	6032	DR: 2573..2846; 5542..5823	gi|124484788|ref|NC_008997.1| Hyposoter fugitivus ichnovirus segment E2	74.39	1140	0.0	Rep1_Hd10	+	1518..2189	672	gi|40737199|gb|AAR89179.1| repeat element protein 7	100.00	224	0.0	gi|124484791|ref|YP_001031348.1| repeat element protein-e2.2	61.03	213	1e-89													gi|325514240|gb|JI257599.1| Contig161484 mRNA sequence	77.42	124	1e-87
							Rep2_Hd10	+	3324..3956	633	gi|40737193|gb|AAR89176.1| repeat element protein 4	87.38	206	1e-126	gi|124484789|ref|YP_001031346.1| repeat element protein-e2.1	64.42	208	1e-88													gi|325514243|gb|JI257602.1|Contig47110 mRNA sequence	59.52	168	6e-77
							Rep3_Hd10	+	4345..4968	624	gi|40737193|gb|AAR89176.1| repeat element protein 4	84.69	209	1e-124	gi|124484789|ref|YP_001031346.1| repeat element protein-e2.1	63.59	206	2e-86	gi|151425901|dbj|BAF73402.1| f3.1	40.91	132	2e-19
Hd9	6211	no detected DR					U1_Hd9	+	1453..1785	333
							U2_Hd9	+	3146..3457	312
							U3_Hd9	-	4162..4512	351
							U4_Hd9	+	5144..5491	348					gi|124484704|ref|YP_001031282.1| c6.3	43.88	98	0.0005
Hd8	7149	no detected DR	gi|124484810|ref|NC_009003.1| Hyposoter fugitivus ichnovirus segment E1	70.51	1187	3e-161	F6U1_Hd8	+	33..347	315
							U2_Hd8	-	1686..1985	300					gi|124484812|ref|YP_001031363.1| e1.2	40.70	86	3e-05
							F6U3_Hd8	+	2284..2601	318
							U4_Hd8	+	3685..3999	315
Hd7	7870	DR1: 391..498; 6873..6969 - DR2: 1048..1633; 6970..7555	gi|124484719|ref|NC_008983.1| Hyposoter fugitivus ichnovirus segment C17	68.75	1485	4e-148	U1_Hd7	-	2613..5852	3240					gi|124484720|ref|YP_001031291.1| c17.1	48.62	325	1e-37
Hd6	9666	DR: 3713..4034; 9326..9666	gi|124484707|ref|NC_008978.1| Hyposoter fugitivus ichnovirus segment C8	75.09	851	3e-157	U1_Hd6	+	join(2505..2594,2871..3257)	477
			gi|124484717|ref|NC_008982.1| Hyposoter fugitivus ichnovirus segment C15	69.31	1274	1e-137	P30_Hd6	+	join(5972..6061,6339..7490)	1242	gi|28194490|gb|AAO33571.1|AF479654_1 Thr-Ser protein	100.00	414	0.0
							Rep1_Hd6	-	8150..8812	663	gi|28194491|gb|AAO33572.1|AF479654_2 rep protein	100.00	221	0.0	gi|124484660|ref|YP_001031251.1| repeat element protein-b4.1	50.30	169	1e-47	gi|124270731|dbj|BAF45626.1| f3.2	41.38	174	3e-30
Hd5	9745	DR1: 247..318; 5650..5722 - DR2: 364..512; 5932..6080 - DR3: 513..616; 6081..6184; 8977..9080 - DR4: 730..798; 6298..6365; 9194..9258 - DR5: 1833..2218; 6737..7122; 9633..9745 - DR6: 5003..5210; 8260..8453 - DR7: 5266..5388; 8504..8627	gi|124484793|ref|NC_008998.1| Hyposoter fugitivus ichnovirus segment G1	79.91	2997	0.0	Vinx1_Hd5	-	475..1494	1020					gi|124484796|ref|YP_001031352.1| viral innexin-g1.2	62.54	347	1e-145	gi|124270708|dbj|BAF45609.1| d4.1	47.21	358	1e-102	gi|94675984|ref|YP_589075.1| innexin-like protein 2	44.85	359	5e-95
							Vinx2_Hd5	-	1643..2182	540					gi|124484797|ref|YP_001031353.1| viral innexin-g1.3	74.36	117	5e-50	gi|124270708|dbj|BAF45609.1| d4.1	42.40	125	3e-25
							U1_Hd5	-	2904..3209	306
							Vinx3_Hd5	-	3427..4485	1059	gi|40217858|gb|AAR82840.1| innexin-like protein 4	74.06	347	2e-176	gi|124484796|ref|YP_001031352.1| viral innexin-g1.2	82.54	355	0.0	gi|124270708|dbj|BAF45609.1| d4.1	47.78	360	1e-109	gi|28630903|gb|AAO45829.1| innexin Vnx-g1	47.35	359	3e-103
							Vinx4_Hd5	-	6043..7086	1044	gi|40217856|gb|AAR82839.1| innexin-like protein 3	98.56	348	0.0	gi|124484797|ref|YP_001031353.1| viral innexin-g1.3	71.47	340	3e-158	gi|124270708|dbj|BAF45609.1| d4.1	44.29	359	4e-95	gi|94675984|ref|YP_589075.1| innexin-like protein 2	41.81	354	1e-87
							Vinx5_Hd5	-	8939..9625	687	gi|40217854|gb|AAR82838.1| innexin-like protein 2	100.00	229	1e-154	gi|124484794|ref|YP_001031350.1| viral innexin-g1.1	67.54	228	1e-101	gi|124270724|dbj|BAF45621.1| e1.1	43.10	232	5e-55	gi|28630903|gb|AAO45829.1| innexin Vnx-g1	45.45	231	8e-57
Hd4	9948	DR1: 5081..6041; 8577..9603 - DR2: 6042..6474; 9604..9948	gi|124484778|ref|NC_008995.1| Hyposoter fugitivus ichnovirus segment D11	75.51	2401	0.0	Rep1_Hd4	-	1012..1755	744					gi|124484781|ref|YP_001031340.1| repeat element protein-d11.3	67.34	248	7e-115	gi|124270692|dbj|BAF45598.1| c7-1.1	45.97	248	7e-71
							Rep2_Hd4	+	2341..2946	606					gi|124484782|ref|YP_001031341.1| repeat element protein-d11.4	74.26	202	2e-101	gi|124270692|dbj|BAF45598.1| c7-1.1	43.75	192	3e-36
							Rep3_Hd4	+	3707..4300	594					gi|124484779|ref|YP_001031338.1| repeat element protein-d11.1	66.67	198	9e-91	gi|124270692|dbj|BAF45598.1| c7-1.1	46.29	175	6e-46
							Rep4_Hd4	+	5036..5641	606					gi|124484779|ref|YP_001031338.1| repeat element protein-d11.1	58.08	198	1e-79	gi|124270692|dbj|BAF45598.1| c7-1.1	41.84	196	1e-39
							Rep5_Hd4	-	6802..7548	747					gi|124484780|ref|YP_001031339.1| repeat element protein-d11.2	69.20	224	2e-112	gi|124270692|dbj|BAF45598.1| c7-1.1	51.09	229	2e-74									gi|325514245|gb|JI257604.1|Contig6662-60196 mRNA sequence	73.72	137	4e-77
							Rep6_Hd4	+	8532..9137	606					gi|124484779|ref|YP_001031338.1| repeat element protein-d11.1	59.38	192	9e-78	gi|124270692|dbj|BAF45598.1| c7-1.1	44.19	172	1e-35
Hd3	9971	DR1: 1..159; 583..731; 4657..4813 - DR2: 160..264; 4898..5002 - DR3: 506..582; 4580..4656; 9897..9971	gi|124484769|ref|NC_008993.1| Hyposoter fugitivus ichnovirus segment D9	73.79	1679	0.0	Cys1_Hd3	-	join(1747..2184,2373..2477)	543					gi|124484770|ref|YP_001031331.1| cysteine motif gene-d9.1	57.55	139	9e-51	gi|218741174|dbj|BAF45771.2| c111.1	51.55	97	5e-26									gi|325514246|gb|JI257605.1|Contig40497 mRNA sequence	55.46	119	3e-48
							Cys2_Hd3	-	join(3341..3835,4056..4160)	600					gi|124484770|ref|YP_001031331.1| cysteine motif gene-d9.1	52.08	144	2e-39	gi|218741174|dbj|BAF45771.2| c111.1	52.58	97	2e-22
							Cys3_Hd3	-	join(5459..5758,5841..5981)	441					gi|124484772|ref|YP_001031333.1| cysteine motif gene-d9.2	68.50	127	4e-59	gi|218741174|dbj|BAF45771.2| c111.1	50.50	101	1e-25
							Cys4_Hd3	-	join(6501..7178,7480..7524)	723					gi|124484770|ref|YP_001031331.1| cysteine motif gene-d9.1	62.18	193	2e-72	gi|218741174|dbj|BAF45771.2| c111.1	55.07	69	7e-19
							Cys5_Hd3	-	join(8131..8412,8530..8622)	375					gi|124484772|ref|YP_001031333.1| cysteine motif gene-d9.2	51.79	112	1e-30	gi|218741174|dbj|BAF45771.2| c111.1	53.76	93	1e-27	gi|28565787|gb|AAO43443.1| A'Hv0.8 cys-motif protein precursor	32.41	108	3e-11	gi|39573705|dbj|BAC55881.2| CcIV 1.0 protein	43.75	64	2e-08
Hd2a	10355	DR1: 3380..3664; 8294..8578 - DR2: 4457..5443; 9372..10355	gi|124484707|ref|NC_008978.1| Hyposoter fugitivus ichnovirus segment C8	72.61	1055	1e-163	GlyPro1_Hd2a	+	join(654..743,1240..2505)	1356	gi|6424861|gb|AAF08193.1|AF132024_1 glycine and proline-rich protein P45 precursor	100.00	452	0.0
			gi|124484687|ref|NC_008970.1| Hyposoter fugitivus ichnovirus segment C1	71.16	846	2e-115	F2U1_Hd2a	-	3316..3660	345
							F3U2_Hd2a	+	4128..4487	360
							GlyPro2_Hd2a	+	join(6022..6129,6327..7409)	1191	gi|5163458|gb|AAD40678.1|AF156933_1 P40 protein	100.00	397	0.0
							F2U3_Hd2a	-	8245..8574	330	gi|28193979|gb|AAO33350.1|AF464930_2 unknown	94.06	101	6e-59
							F3U4_Hd2a	+	9043..9402	360	gi|28193980|gb|AAO33351.1|AF464930_3 unknown	100.00	120	3e-66
Hd2b	8927	DR1: 1..285; 4915..5199 - DR2: 1078..2064; 5993..6976	gi|124484707|ref|NC_008978.1| Hyposoter fugitivus ichnovirus segment C8	72.61	1055	8e-164	F3U2_Hd2b	+	749..1108	360
			gi|124484687|ref|NC_008970.1| Hyposoter fugitivus ichnovirus segment C1	77.51	778	3e-169	GlyPro2_Hd2b	+	join(2643..2750,2948..4030)	1191	gi|5163458|gb|AAD40678.1|AF156933_1 P40 protein	100.00	397	0.0
			gi|124484719|ref|NC_008983.1| Hyposoter fugitivus ichnovirus segment C17	76.21	580	6e-115	F2U3_Hd2b	-	4866..5195	330	gi|28193979|gb|AAO33350.1|AF464930_2 unknown	94.06	101	6e-59
							F3U4_Hd2b	+	5664..6023	360	gi|28193980|gb|AAO33351.1|AF464930_3 unknown	100.00	120	3e-66
							SerThr_Hd2b	+	join(7544..7633,7895..8452)	648	gi|28193978|gb|AAO33349.1|AF464930_1 unknown	100.00	168	1e-108
Hd1	36006	DR1: 1..70; 6222..6334; 12681..12793; 20731..20841; 28324..28434 - DR2: 830..1063; 7117..7350; 13575..13813; 29218..29456 - DR3: 1064..1242; 7351..7529; 21864..22042; 29457..29635 - DR4: 1243..1478; 7530..7765; 22043..22278; 29636..29871	gi|124484701|ref|NC_008976.1| Hyposoter fugitivus ichnovirus segment C6	74.13	808	2e-135	F7U1_Hd1	-	745..1170	426
							F8U2_Hd1	+	2517..3020	604					gi|124484704|ref|YP_001031282.1| c6.3	40.22	184	5e-09
							F9U3_Hd1	-	4175..4555	381
							F10U4_Hd1	-	5408..5725	318
							F7U5_Hd1	-	7032..7457	426
							F8U6_Hd1	+	8804..9307	504					gi|124484704|ref|YP_001031282.1| c6.3	40.22	184	5e-09
							F9U7_Hd1	-	10550..10921	372
							F11U8_Hd1	+	15460..15777	318
							U9_Hd1	+	19117..19458	342
							F11U10_Hd1	+	19528..19872	345
							F7U11_Hd1	-	21638..21970	333
							F8U12_Hd1	+	23204..23743	540					gi|124484704|ref|YP_001031282.1| c6.3	56.00	50	0.001
							F9U13_Hd1	-	24840..25307	468
							F10U14_Hd1	-	25788..26102	315
							F11U15_Hd1	+	27121..27465	345
							F7U16_Hd1	-	29231..29563	333
							F8U17_Hd1	+	30797..31336	540					gi|124484704|ref|YP_001031282.1| c6.3	56.00	50	0.001
							F9U18_Hd1	-	32433..32900	468
							F10U19_Hd1	-	33381..33860	480
segment not known							GlyPro3		no segment	2051	gi|6424859|gb|AAF08192.1|AF132023_1 glycine and proline-rich protein P69 precursor	100.00	683	0.0
